# Supplementary material for: Grain and stoichiometry engineering for ultra-sensitive perovskite X-ray detectors
Source: Royal Society of Chemistry journal article supplement (doi:10.1039/d1ta07585c), 2021-01-01
Supplement: d1ta07585c1.pdf [file d1ta07585c1.pdf]

## Supporting Information

### **Grain and stoichiometry engineering for ultra-sensitive perovskite X-ray detectors**

Yingrui Xiao,<sup>a</sup> Shanshan Jia,<sup>a</sup> Nuo Bu,<sup>a</sup> Nan Li,<sup>a</sup> Yucheng Liu,<sup>a</sup> Ming Liu,<sup>b</sup> Zhou Yang,<sup>\*a</sup> and Shengzhong (Frank) Liu<sup>\*ac</sup>

*Detailed procedure for the preparation of the title compound*

First, 1 g MAI powder was dissolved in 10 ml IPA at 80 °C , then 2 g of  $\text{PbI}_2$  powder was slowly added into 10 ml of MAI solution (100 g/L) in IPA under stirring at 80 °C. After stirring 2 h at this temperature, the solution was centrifuged and washed by IPA three times, and then the precipitate was placed into a drying oven of 60 °C. Finally, black  $\text{MAPbI}_3$  perovskite powder was obtained. 1 g  $\text{MAPbI}_3$  powder and 6.4 mg MAI powder (the molar ratio of MAI to  $\text{MAPbI}_3$  powder is 2.5%) were mixed and fully ground in a mortar. Finally, ground powder was hot-pressed at 250 °C for 1 h as mentioned in pellets preparation.

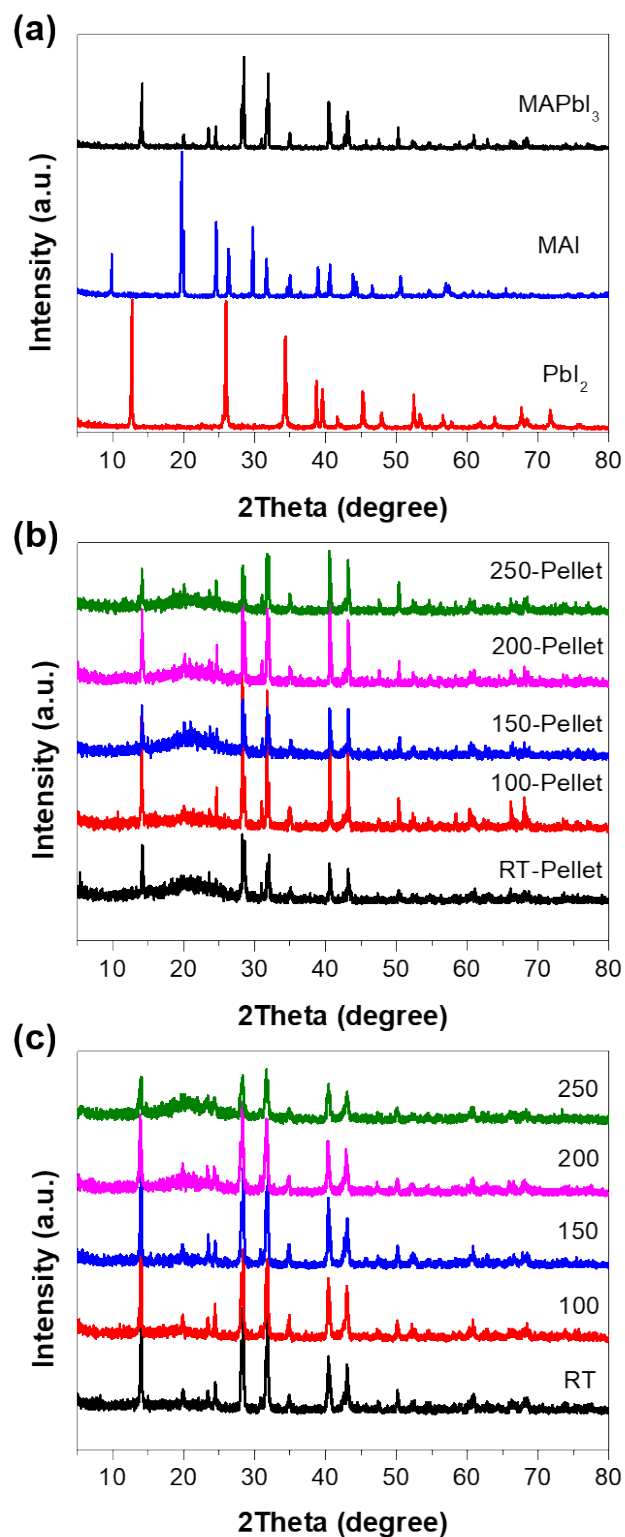

**Figure S1.** The X-ray diffraction (XRD) patterns of MAPbI<sub>3</sub> powder, MAI powder and PbI<sub>2</sub> powder (a), XRD patterns of MAPbI<sub>3</sub> pellets obtained at different hot-press temperatures (b) and ground powder from pellets (c).

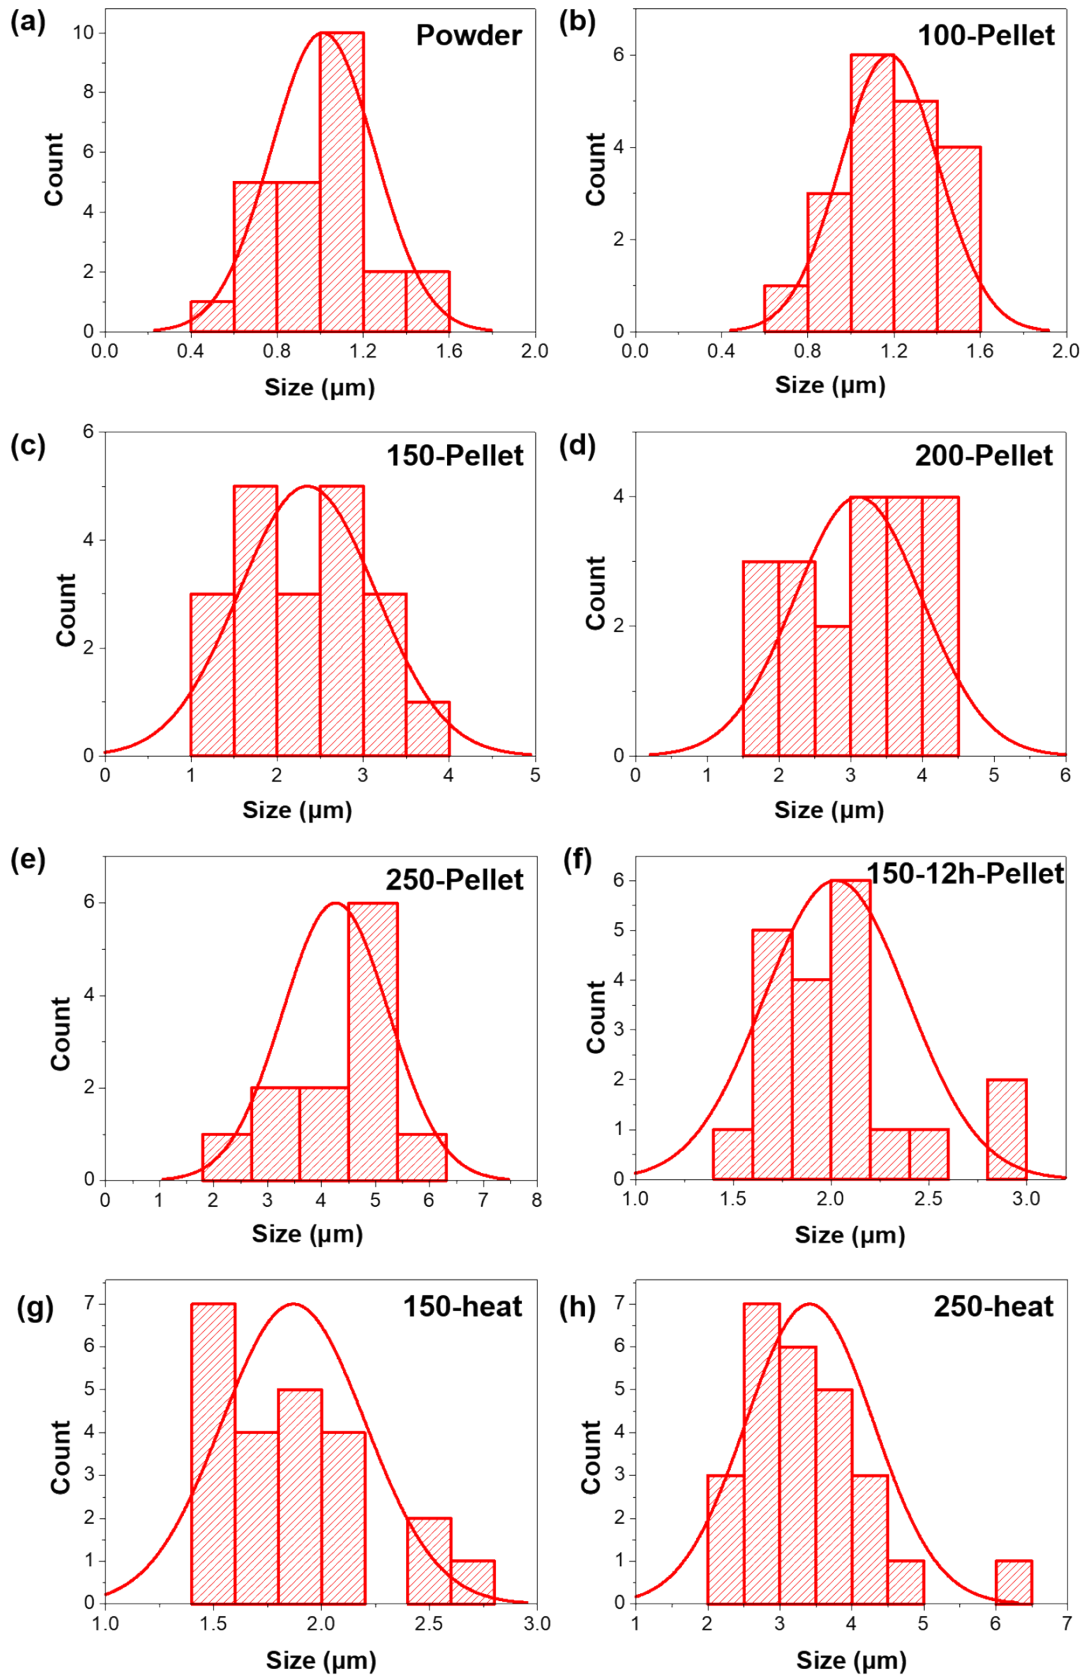

**Figure S2.** Grain size statistics of (a) powder; (b) 100-Pellet; (c) 150-Pellet; (d) 200-Pellet; (e) 250-Pellet; (f) hot-pressed at 150 °C for 12 h, (g) heat treatment at 150 °C and (h) heat treatment at 250 °C.

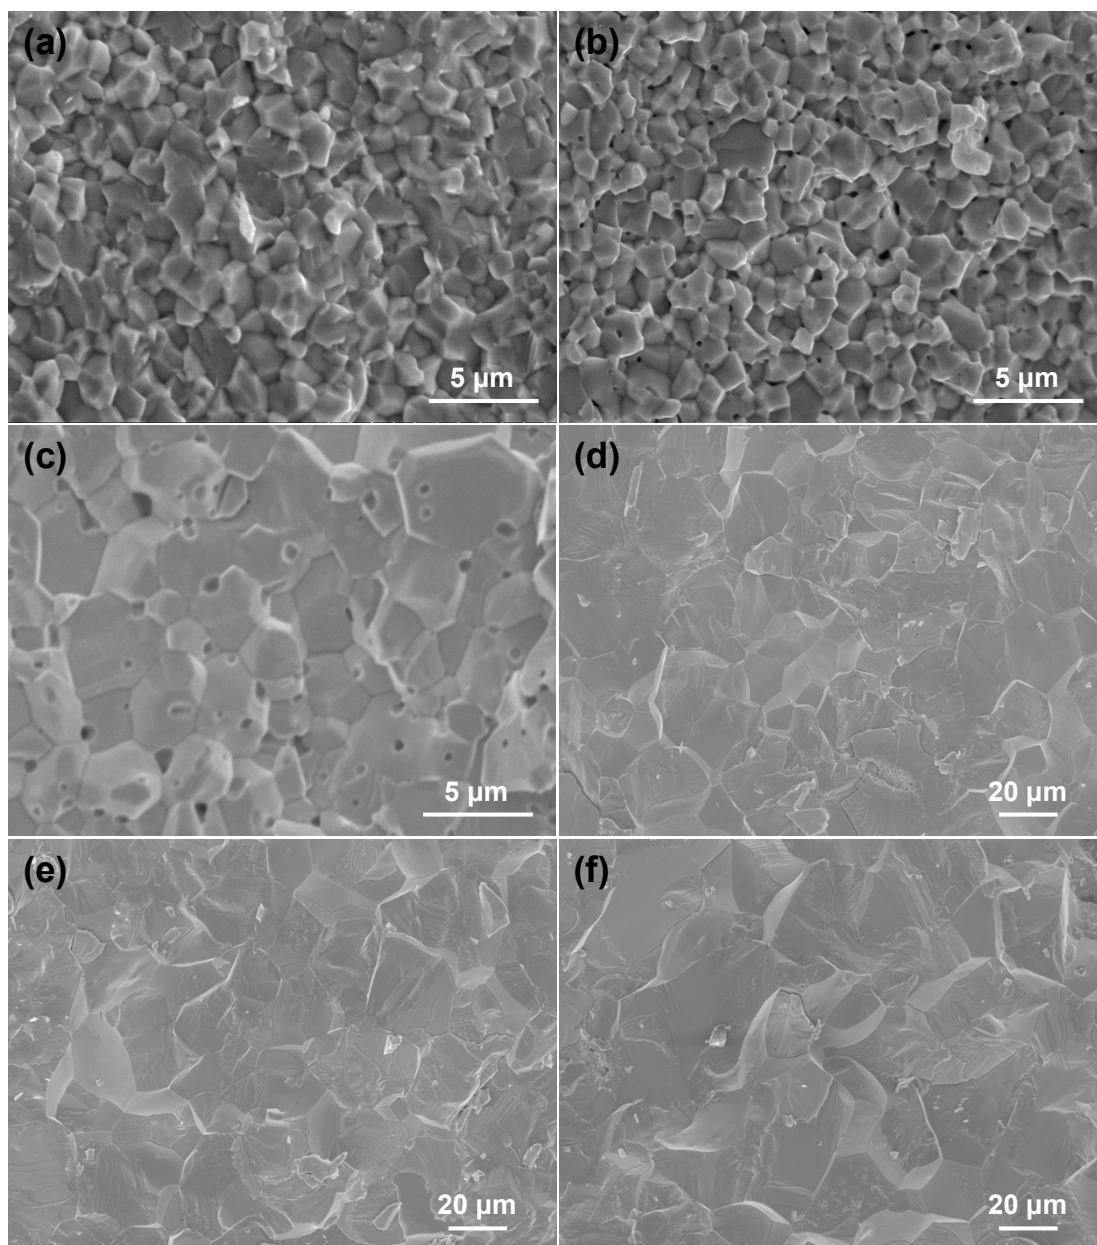

**Figure S3.** Scanning electron microscopy images of MAPbI<sub>3</sub> pellets: (a) 150-heat pellet; (b) 250-heat pellet; (c) hot pressed for 12 h; (d) 1.25-250 pellet; (e) 2.50-250 pellet; (f) 5.00-250 pellet.

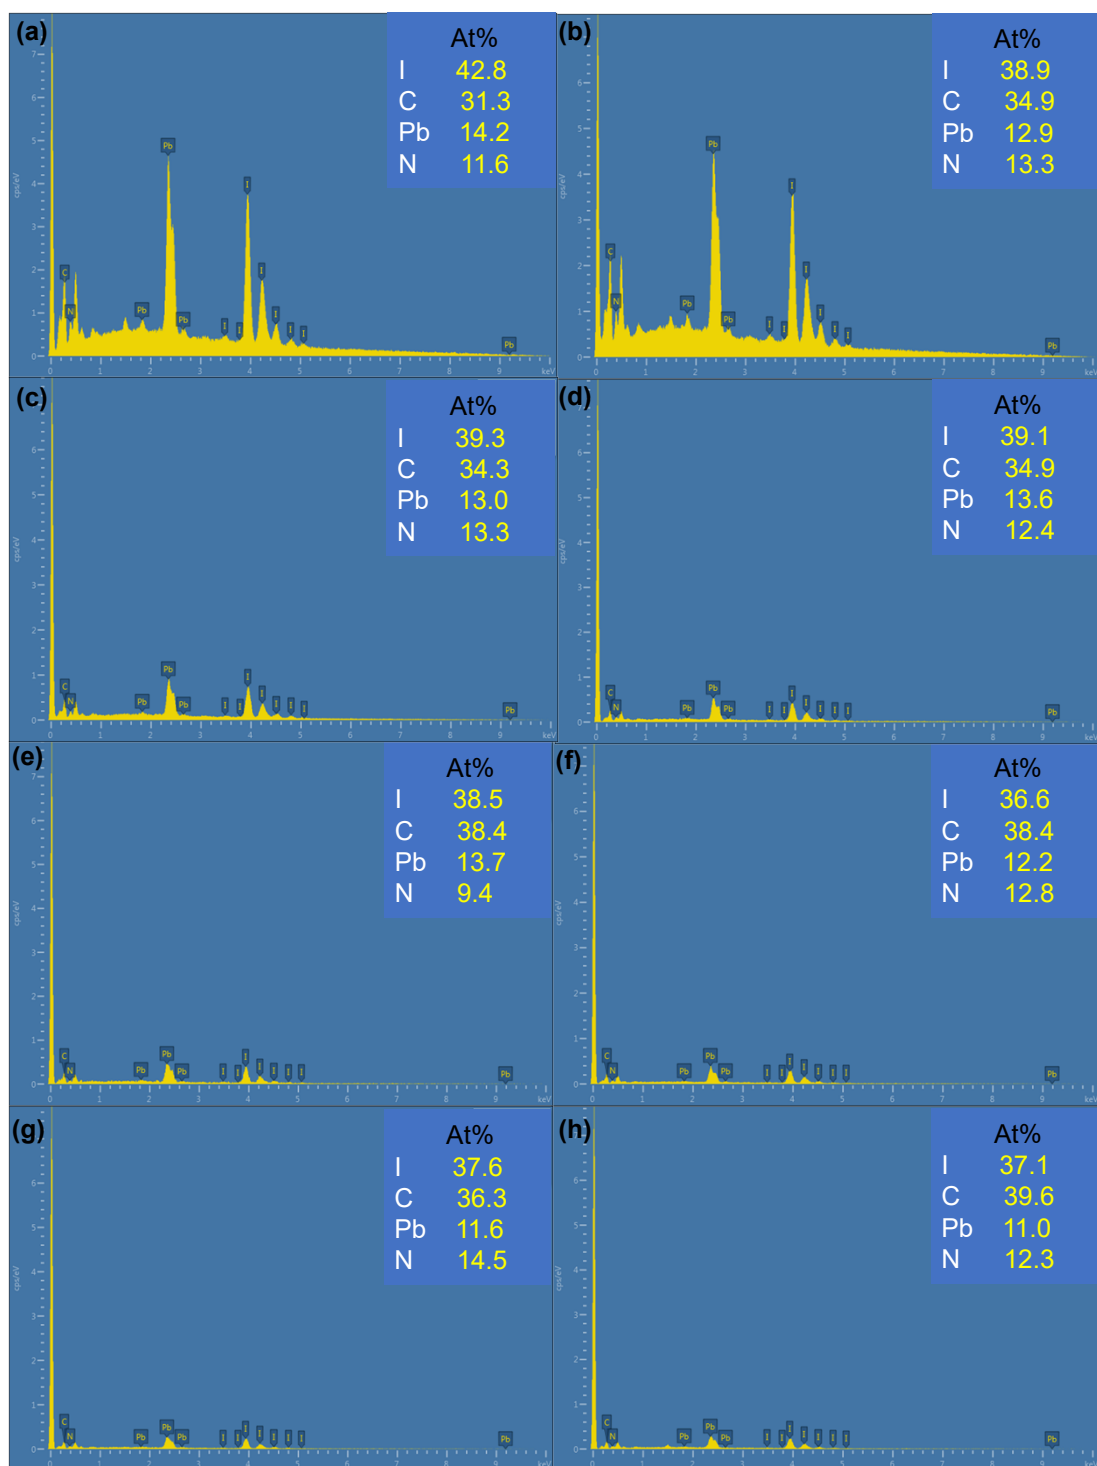

**Figure S4.** Atomic% of different elements in (a) RT-pellet; (b) 100-pellet; (c) 150-pellet; (d) 200-pellet; (e) 250-pellet; (f) 1.25-250 pellet; (g) 2.50-250 pellet; (h) 5.00-250 pellet.

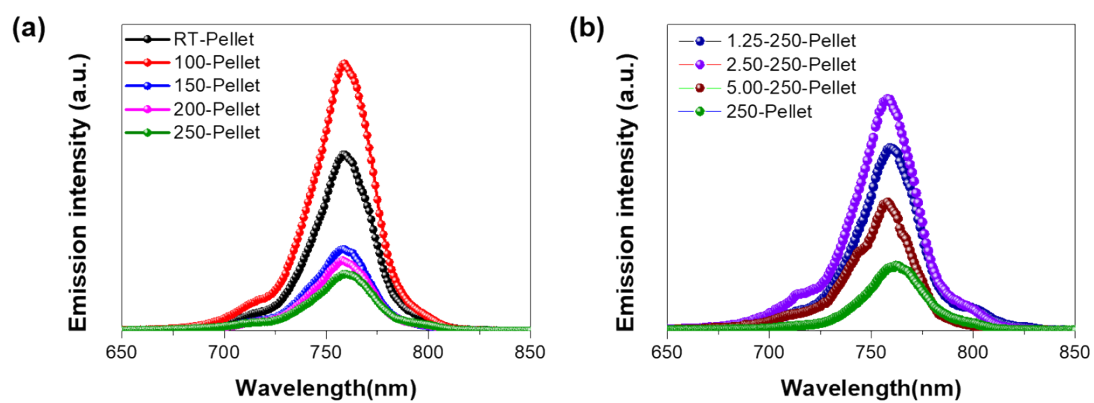

**Figure S5.** (a) Photoluminescence (PL) of pellets pressed at temperatures varying from RT to 250 °C, and (b) pellets pressed at 250 °C with different amounts of excess MAI from 0 to 5%.

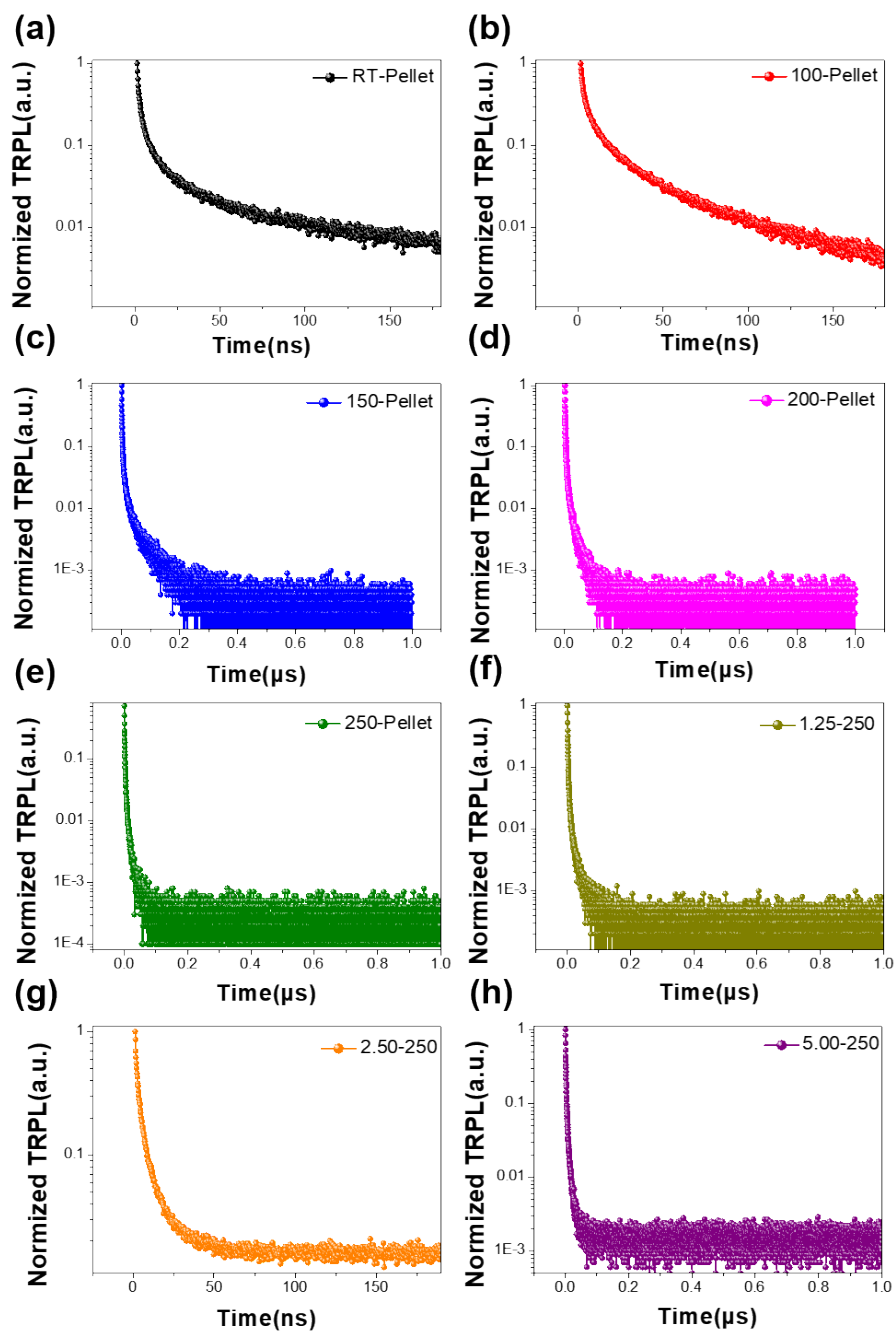

**Figure S6.** Time-resolved photoluminescence of (a) RT-Pellet; (b) 100-Pellet; (c) 150-Pellet; (d) 200-Pellet; (e) 250-Pellet; (f) 1.25-250; (g) 2.50-250; (h) 5.00-250.



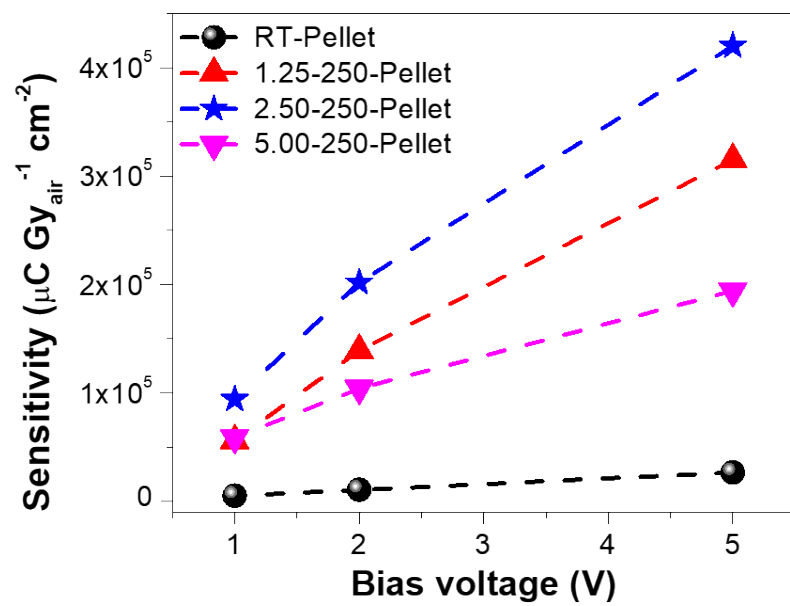

**Figure S7.** Sensitivities of devices based on RT, 1.25-250, 2.50-250, 5.00-250 pellets at biases of 1 V, 2 V and 5 V

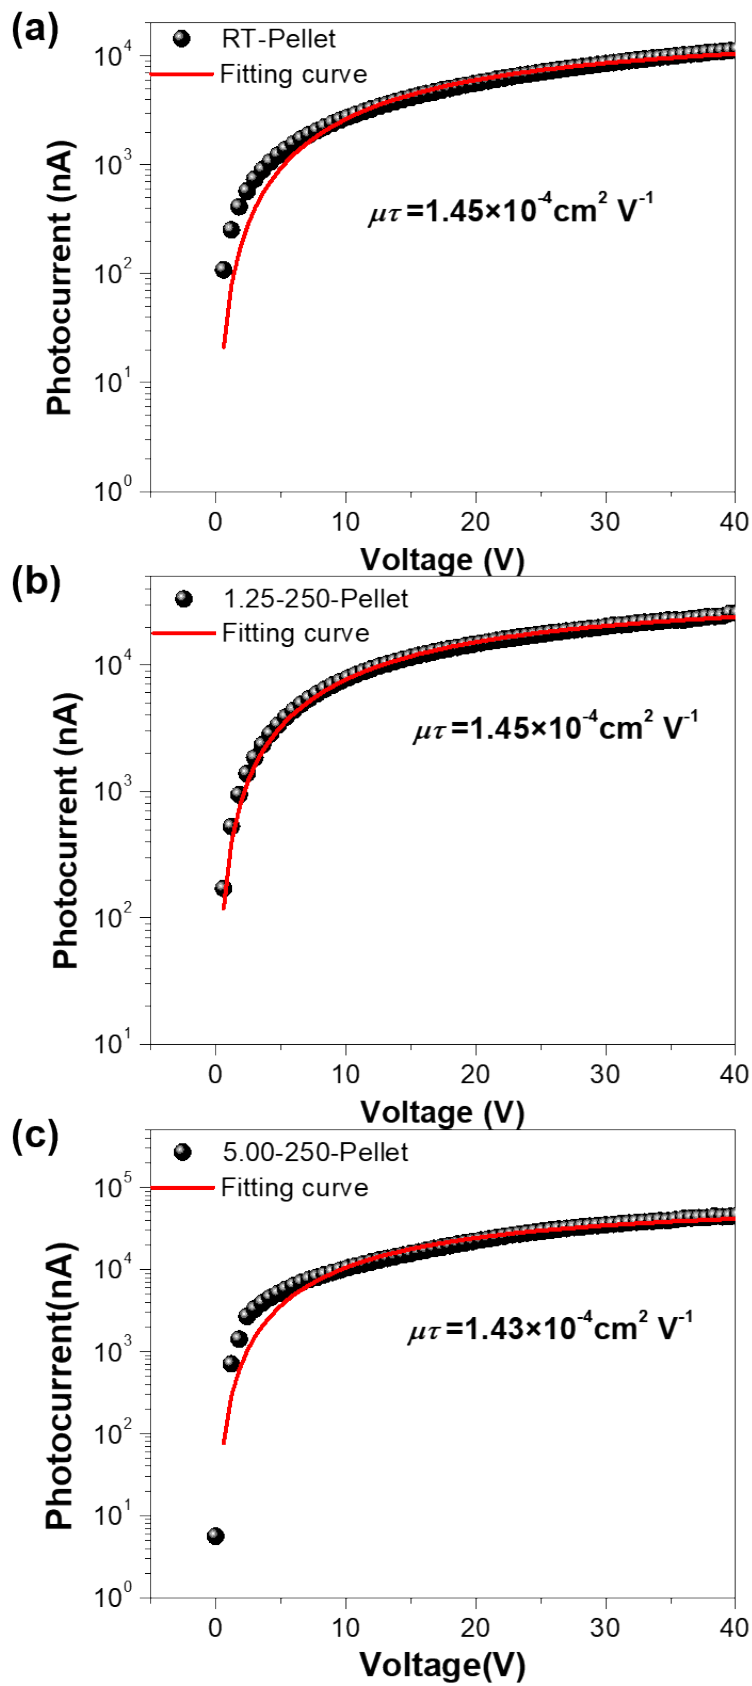

Figure S8. Photoconductivity curves of (a) RT, (b) 1.25-250 and (c) 5.00-250 devices.

**Table S1.** Summaries of fitting parameters for time-resolved photoluminescence (TRPL) for a cross-section of different pellets.

| Sample     | Average $\tau$ (ns) | $\tau_1$ (ns) | Amplitude $\tau_1$ (%) | $\tau_2$ (ns) | Amplitude $\tau_2$ (%) |
|------------|---------------------|---------------|------------------------|---------------|------------------------|
| RT-Pellet  | 19.19               | 28.36         | 12.97                  | 2.292         | 87.03                  |
| 100-Pellet | 22.14               | 29.997        | 19.46                  | 2.973         | 80.54                  |
| 150-Pellet | 15.62               | 34.50         | 3.77                   | 1.856         | 96.23                  |
| 200-Pellet | 7.18                | 15.97         | 6.00                   | 1.6063        | 94                     |
| 250-Pellet | 3.07                | 6.594         | 7.07                   | 0.766         | 92.93                  |
| 1.25-250   | 4.72                | 12.184        | 4.63                   | 1.282         | 95.37                  |
| 2.50-250   | 6.10                | 8.802         | 23.38                  | 1.6164        | 76.62                  |
| 5.00-250   | 4.07                | 8.115         | 10.64                  | 1.5456        | 89.36                  |

**Table S2.** Gain factors of different devices at biases of 1 V, 2 V and 5 V.

| Device    | Gain at 1V | Gain at 2V | Gain at 5V |
|-----------|------------|------------|------------|
| RT-Pellet | 65.28      | 140.59     | 348.64     |
| 1.25-250  | 850.40     | 2135.44    | 4930.70    |
| 2.50-250  | 1347.48    | 2913.25    | 6126.35    |
| 5.00-250  | 955.17     | 1720.62    | 3316.88    |

**Table S3.** Key parameters of polycrystalline perovskites-based X-ray detectors

| Device structure                                                                       | $E_{\text{ph}}$<br>(keV) | E<br>(V mm <sup>-1</sup> ) | $\mu\tau$<br>(cm <sup>2</sup> V <sup>-1</sup> ) | S<br>( $\mu\text{C Gy}_{\text{air}}^{-1}\text{cm}^{-2}$ ) | LoD<br>(nGy <sub>air</sub> s <sup>-1</sup> ) | Ref          |
|----------------------------------------------------------------------------------------|--------------------------|----------------------------|-------------------------------------------------|-----------------------------------------------------------|----------------------------------------------|--------------|
| Ag/ZnO/PCBM/<br>MAPbI <sub>3</sub> /PEDOT:<br>PSS/ITO                                  | 38                       | 200                        | $2\times 10^{-4}$                               | 2527                                                      | -                                            | 1            |
| ITO/TFT/PI-<br>MAPbI <sub>3</sub> /MAPbI <sub>3</sub> /PI-<br>MAPbBr <sub>3</sub> /ITO | (100<br>kV) <sup>a</sup> | 60                         | $1\times 10^{-4}$                               | $1.1\times 10^4$                                          | -                                            | 2            |
| Au/MAPbI <sub>3</sub> /PCBM/Au                                                         | (40 kV) <sup>a</sup>     | 12.5                       | $3.8\times 10^{-4}$                             | $1.2\times 10^5$                                          | -                                            | 3            |
| FTO/CsPbBr <sub>3</sub> /Au                                                            | 30                       | 5                          | $1.3\times 10^{-2}$                             | $5.6\times 10^4$                                          | 215                                          | 4            |
| Au/Cs <sub>2</sub> AgBiBr <sub>6</sub> /Au                                             | 30                       | 500                        | $5.5\times 10^{-3}$                             | 250                                                       | 95.3                                         | 5            |
| Au/MAPbI <sub>3</sub> /Au                                                              | -(40 kV)<br>a            | 1.32                       | $5.46\times 10^{-3}$                            | $9.4\times 10^4$                                          | 350                                          | this<br>work |

<sup>a</sup>Only the acceleration voltage of the X-ray sources rather than its peak photon energy is provided.

## References

- [1] Y. C. Kim, K. H. Kim, D.-Y. Son, D.-N. Jeong, J.-Y. Seo, Y. S. Choi, I. T. Han, S. Y. Lee and N.-G. Park, *Nature* 2017, **550**, 87.
- [2] L. Yao, G. Niu, L. Yin, X. Du, Y. Lin, X. Den, J. Zhang, and J. Tang, *J. Mater. Chem. C* 2020, **8**, 1239.
- [3] X. Zheng, W. Zhao, P. Wang, H. Tan, M. I. Saidaminov, S. Tie, L. Chen, Y. Peng, J. Long and W.-H. Zhang, *J. Energy Chem.* 2020, **49**, 299.
- [4] W. Pan, B. Yang, G. Niu, K. H. Xue, X. Du, L. Yin, M. Zhang, H. Wu, X. S. Miao and J. Tang, *Adv. Mater.* 2019, **31**, e1904405.
- [5] B. Yang, W. Pan, H. Wu, G. Niu, J. H. Yuan, K. H. Xue, L. Yin, X. Du, X. S. Miao, X. Yang, Q. Xie and J. Tang, *Nat. Commun.* 2019, **10**, 1989.
